# Supplementary material for: Sarcoidosis in the UK: insights from British Thoracic Society registry data
Source: PubMed Central journal article supplement — BMJ Open Respir Res. 2019 Feb 18;6(1):e000357. doi: 10.1136/bmjresp-2018-000357 (PMC6424275; doi:10.1136/bmjresp-2018-000357), 2019-02-18
Supplement: bmjresp-2018-000357supp002.pdf [file bmjresp-2018-000357supp002.pdf]

## Appendix 2

Distribution of recruitment for the BTS sarcoidosis registry as of July 2017

| Institution                             | Records |
|-----------------------------------------|---------|
| Wythenshawe Hospital                    | 66      |
| Hammersmith Hospital                    | 65      |
| Southmead Hospital                      | 53      |
| University Hospital of North Midlands   | 29      |
| New Cross Hospital                      | 14      |
| Churchill Hospital                      | 13      |
| University Hospital                     | 10      |
| North Devon District Hospital           | 6       |
| Royal Devon & Exeter Hospital           | 6       |
| University Hospital Aintree             | 5       |
| Aberdeen Royal Infirmary                | 4       |
| Countess of Chester Hospital            | 4       |
| George Eliot Hospital                   | 4       |
| Nottingham City Hospital                | 4       |
| Papworth Hospital                       | 4       |
| Birmingham Heartlands Hospital          | 3       |
| North Middlesex University Hospital     | 3       |
| Royal Lancaster Infirmary               | 3       |
| Southampton General Hospital            | 3       |
| Castle Hill Hospital                    | 2       |
| Ealing Hospital                         | 2       |
| Harrogate District Hospital             | 2       |
| Norfolk and Norwich University Hospital | 2       |
| Patient transferred from Registry site  | 1       |
